# Supplementary material for: Tunable resonant Raman scattering with temperature in vertically aligned 2H-SnS 2
Source: Royal Society of Chemistry journal article supplement (doi:10.1039/d5nr01717c), 2025-01-01
Supplement: d5nr01717c1.pdf [file d5nr01717c1.pdf]

Supplementary information:

# **Tunable resonant Raman scattering with temperature in vertically aligned 2H-SnS<sub>2</sub>**

Atul G. Chakkar<sup>1,\*</sup>, Deepu Kumar<sup>1</sup>, Ashok Kumar<sup>2</sup>, Mahesh Kumar<sup>2</sup>, and Pradeep Kumar<sup>1,#</sup>

<sup>1</sup>*School of Physical Sciences, Indian Institute of Technology Mandi, Mandi-175005, India*

<sup>2</sup>*Department of Electrical Engineering, Indian Institute of Technology Jodhpur, 342037, India*

\*E-mail: atulchakkar16@gmail.com

#E-mail: pkumar@iitmandi.ac.in

## **Raman tensors for SnS<sub>2</sub>:**

$$A_{1g} = \begin{pmatrix} a & 0 & 0 \\ 0 & a & 0 \\ 0 & 0 & b \end{pmatrix} \text{ and } E_g = \begin{pmatrix} c & 0 & 0 \\ 0 & -c & d \\ 0 & d & 0 \end{pmatrix}, \begin{pmatrix} 0 & -c & -d \\ -c & 0 & 0 \\ -d & 0 & 0 \end{pmatrix}$$

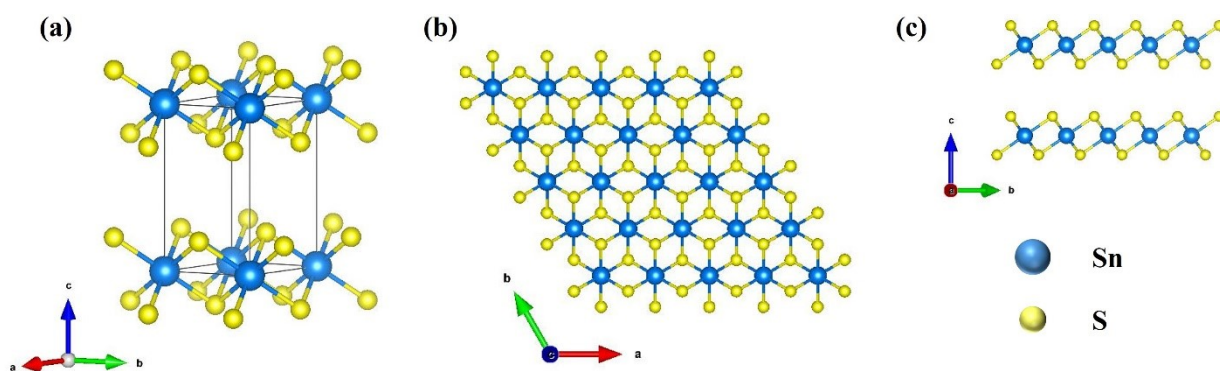

**Figure S1.** Shows the crystal structure of 2H SnS<sub>2</sub>: **(a)** Shows the primitive unit cell. **(b)** and **(c)** Shows the top and side view of crystal structure.

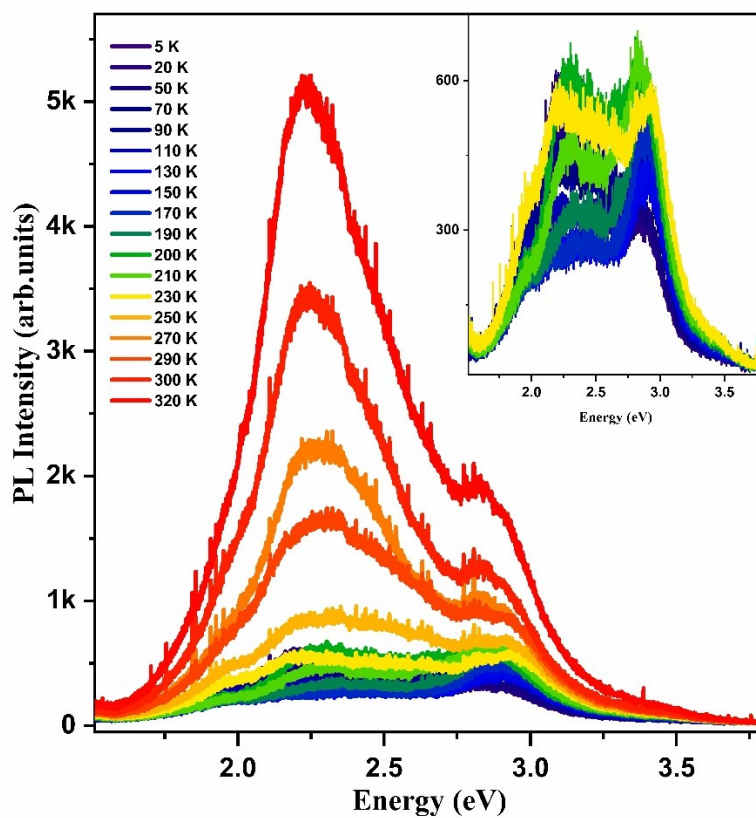

**Figure S2:** Shows the temperature evolution of the PL spectra for the VA 2H-SnS<sub>2</sub> in the temperature range of  $\sim 5$ -320 K. inset shows the evolution of the PL spectra for the low temperature range.
